# Supplementary material
Source: MDPI journal article supplement (https://www.mdpi.com/2076-3417/11/2/519)
Supplement: s1 [file s1]

## Supplementary Materials

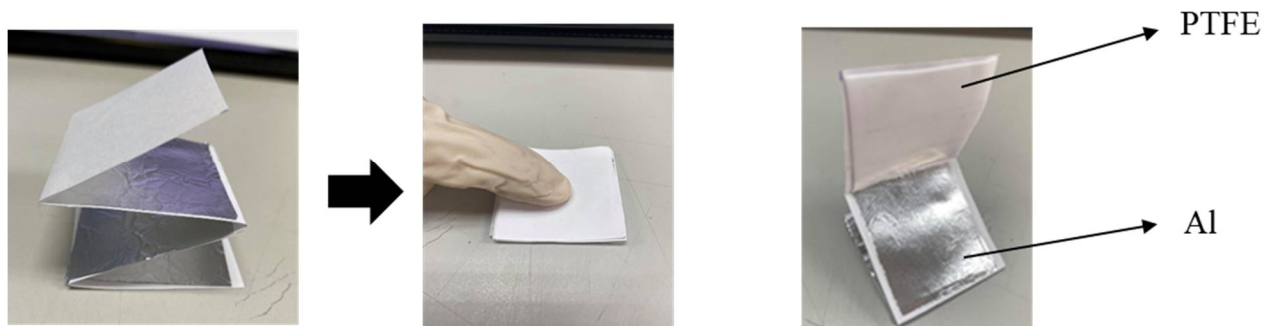

**Figure S1.** The operation of the Zigzag shape electrostatic generator, the upper layer is a PTFE film containing microstructures, the lower layer is Al film. From left to right is the mode of action of TENG.

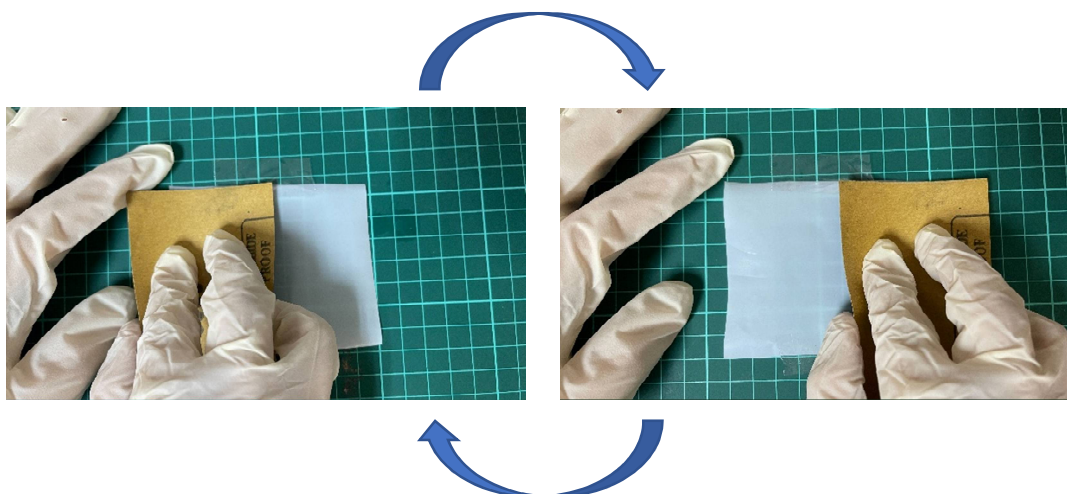

**Figure S2.** The method of use sand papers to grind the surface of PTFE. Fix the PTFE and repeat the grinding action in parallel direction about 20 cycles.

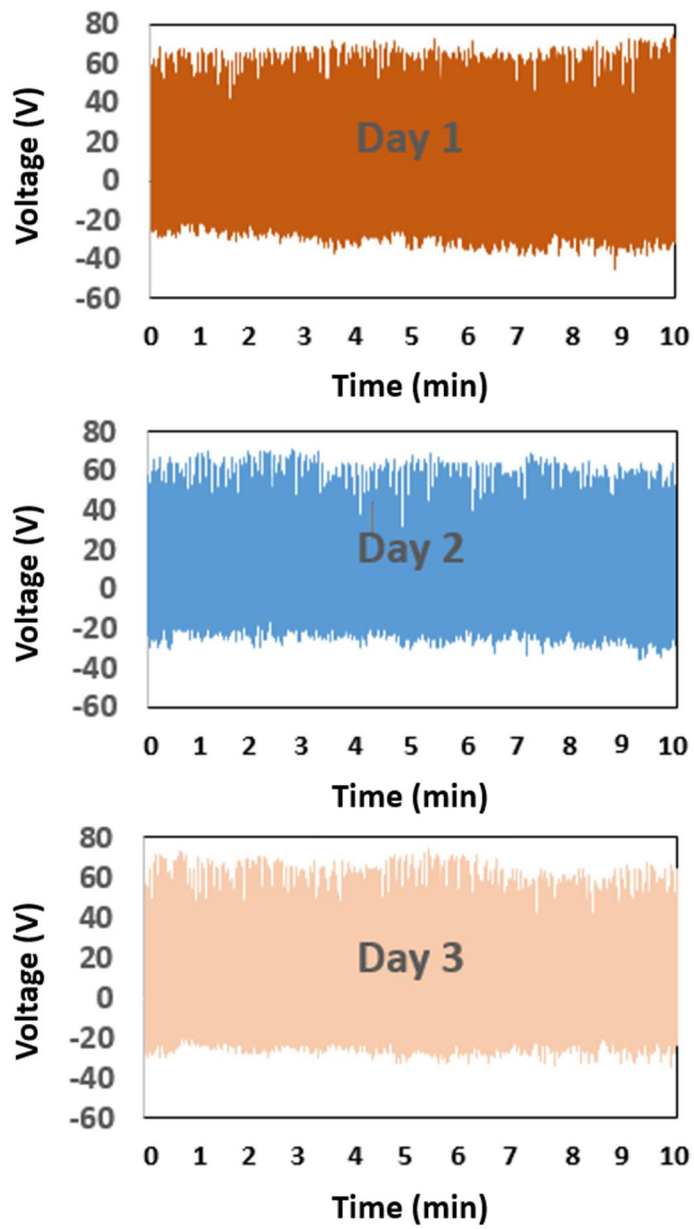

**Figure S3.** Long term Stability tested of PENG for three days. The output voltages of the PENG operating at 1Hz for 10 min per day.

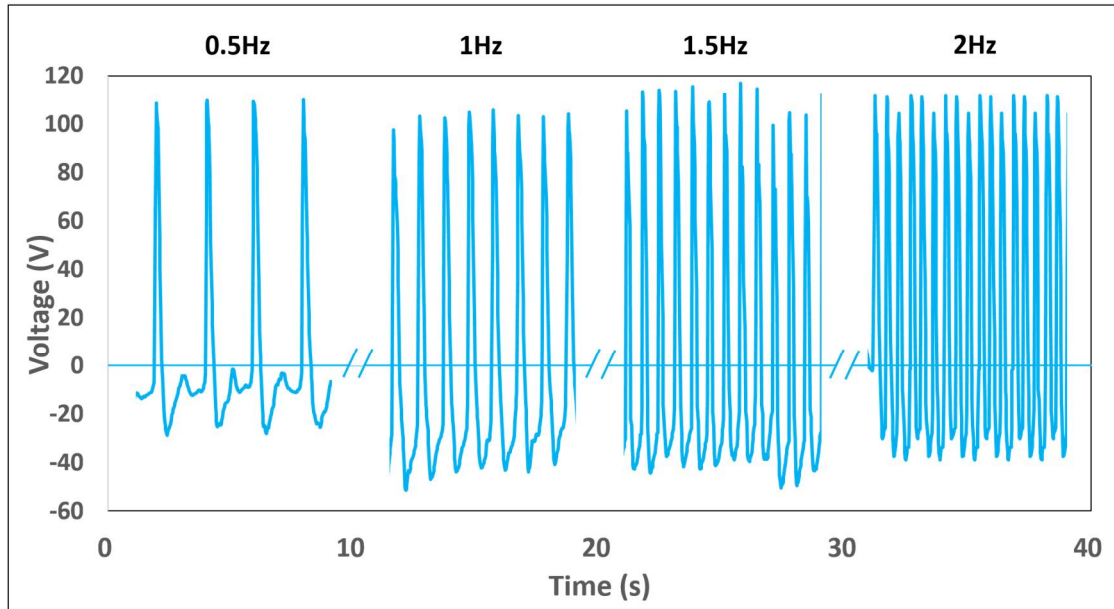

**Figure S4.** Frequency test. The output of the NG with the increase in driving frequency, showing its good stability.

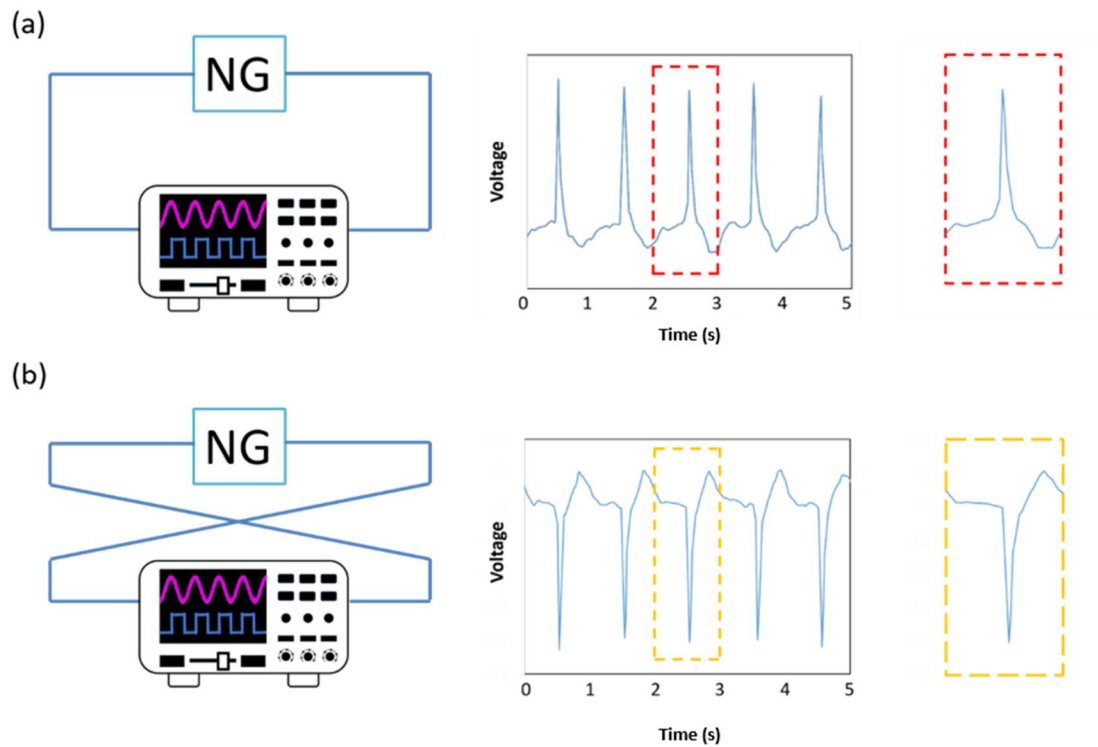

**Figure S5.** Validated tests of polarity. The peak voltage was obtained by (a) the forward connection and (b) reverse connection.

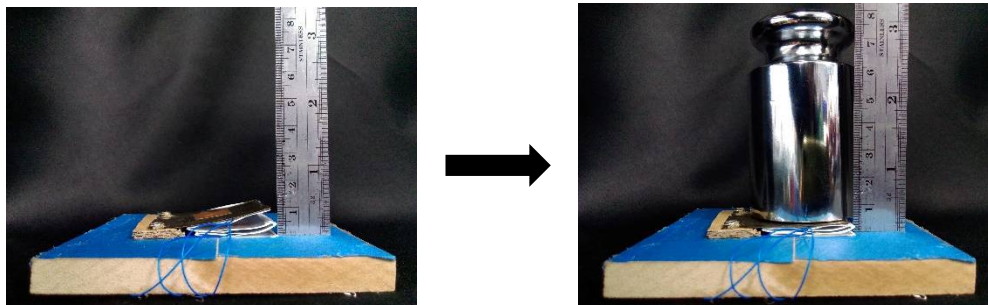

**Figure S6.** Schematic diagram of the experimental method for the applied force-voltage output diagram.

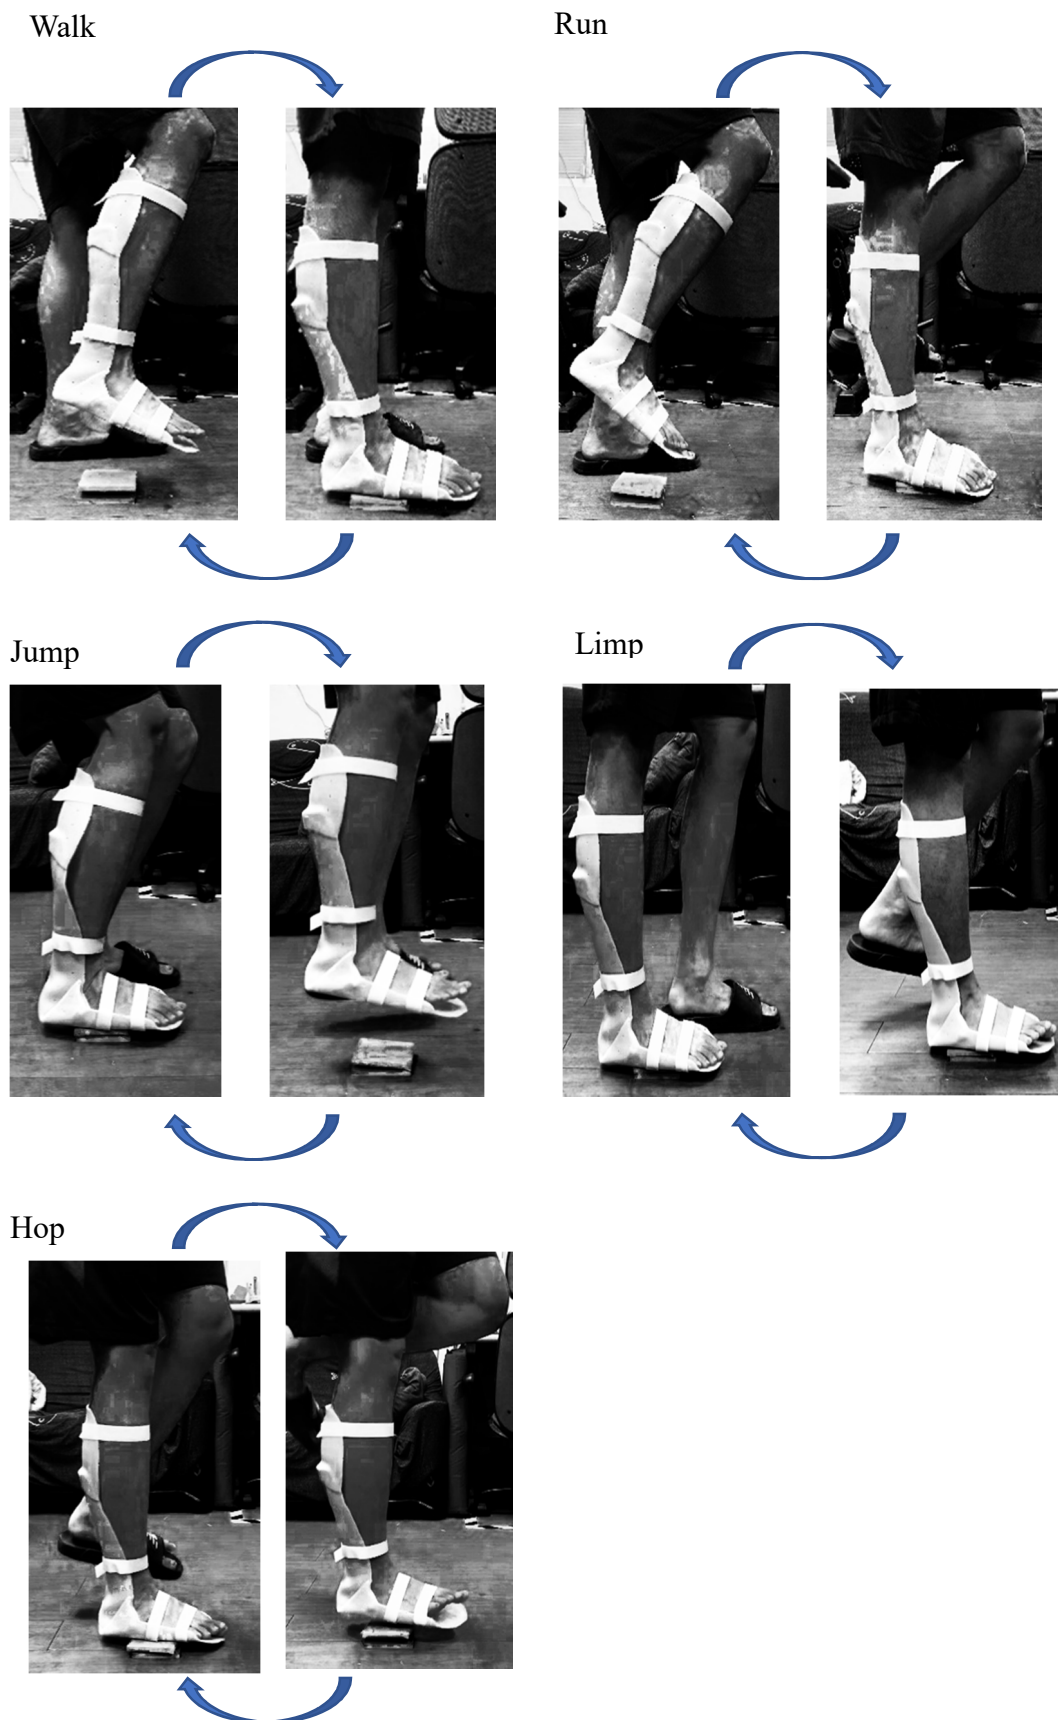

**Figure S7.** Isolated motion schematic image of five different action (walk, run, jump, limp, hop) in rehabilitation device application.

**Table S1.** Tester Information.

| <b>age</b> | <b>weight</b> | <b>height</b> | <b>gender</b> |
|------------|---------------|---------------|---------------|
| 23 y       | 56 kg         | 169 cm        | male          |
| 24 y       | 85 kg         | 183 cm        | male          |
| 23 y       | 48 kg         | 162 cm        | female        |
